# Supplementary material for: Cost-minimization analysis of GSTP1c.313A>G genotyping for the prevention of cisplatin-induced nausea and vomiting: A Bayesian inference approach
Source: PubMed Central journal article supplement (PMC6417645; doi:10.1371/journal.pone.0213929), 2019-03-14

## 1. Polymorphism Simulation (AG/GG) – Frequency

Model summary

---

Likelihood:

GSTP1\_AG\_GG ~ bernoulli({theta})

Prior:

{theta} ~ beta(178,114)

---

Bayesian Bernoulli model                      MCMC iterations = 12,500  
Random-walk Metropolis-Hastings sampling    Burn-in = 2,500  
MCMC sample size = 10,000

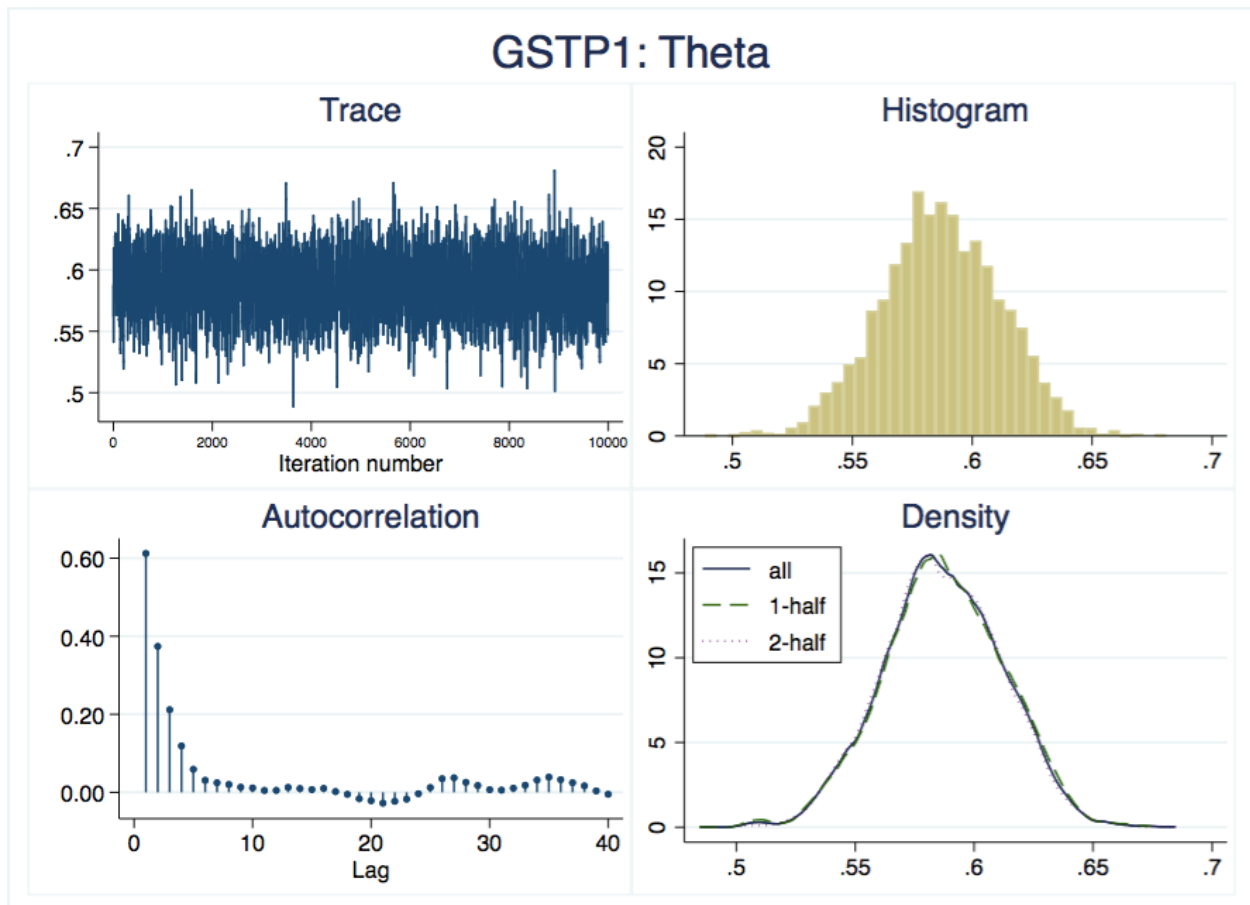

## 2. Grade $\frac{3}{4}$ Nausea Simulation

Model summary

---

Likelihood:

$$NV \sim \text{bernoulli}(\{\theta\})$$

Prior:

$$\{\theta\} \sim \text{beta}(33,191)$$

---

Bayesian Bernoulli model                      MCMC iterations = 12,500  
Random-walk Metropolis-Hastings sampling    Burn-in = 2,500  
MCMC sample size = 10,000

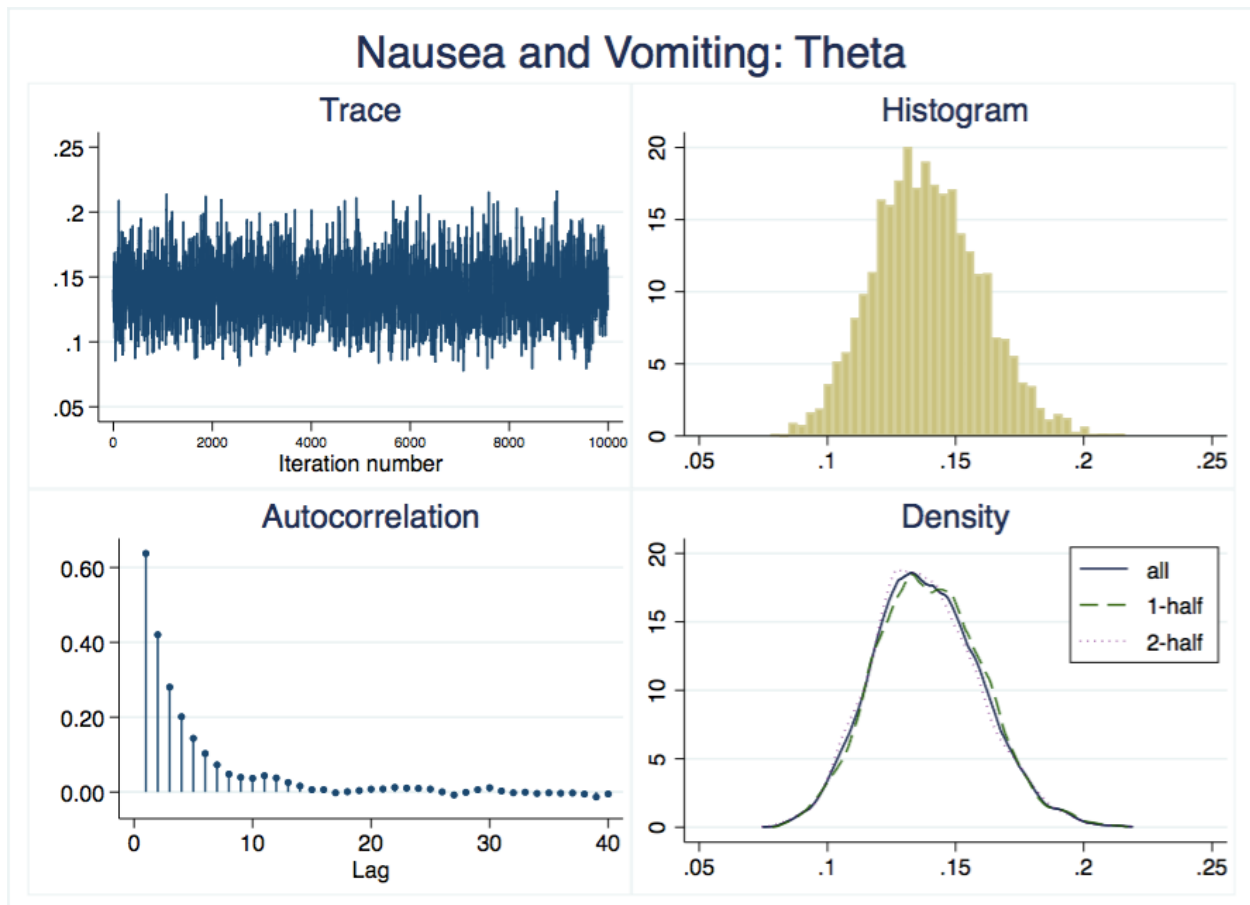

### 3. Continuing to Second Cycle Probability Simulation

Model summary

---

Likelihood:

fase1 ~ bernoulli({theta})

Prior:

{theta} ~ beta(160,12)

---

Bayesian Bernoulli model                      MCMC iterations = 12,500  
Random-walk Metropolis-Hastings sampling    Burn-in = 2,500  
MCMC sample size = 10,000

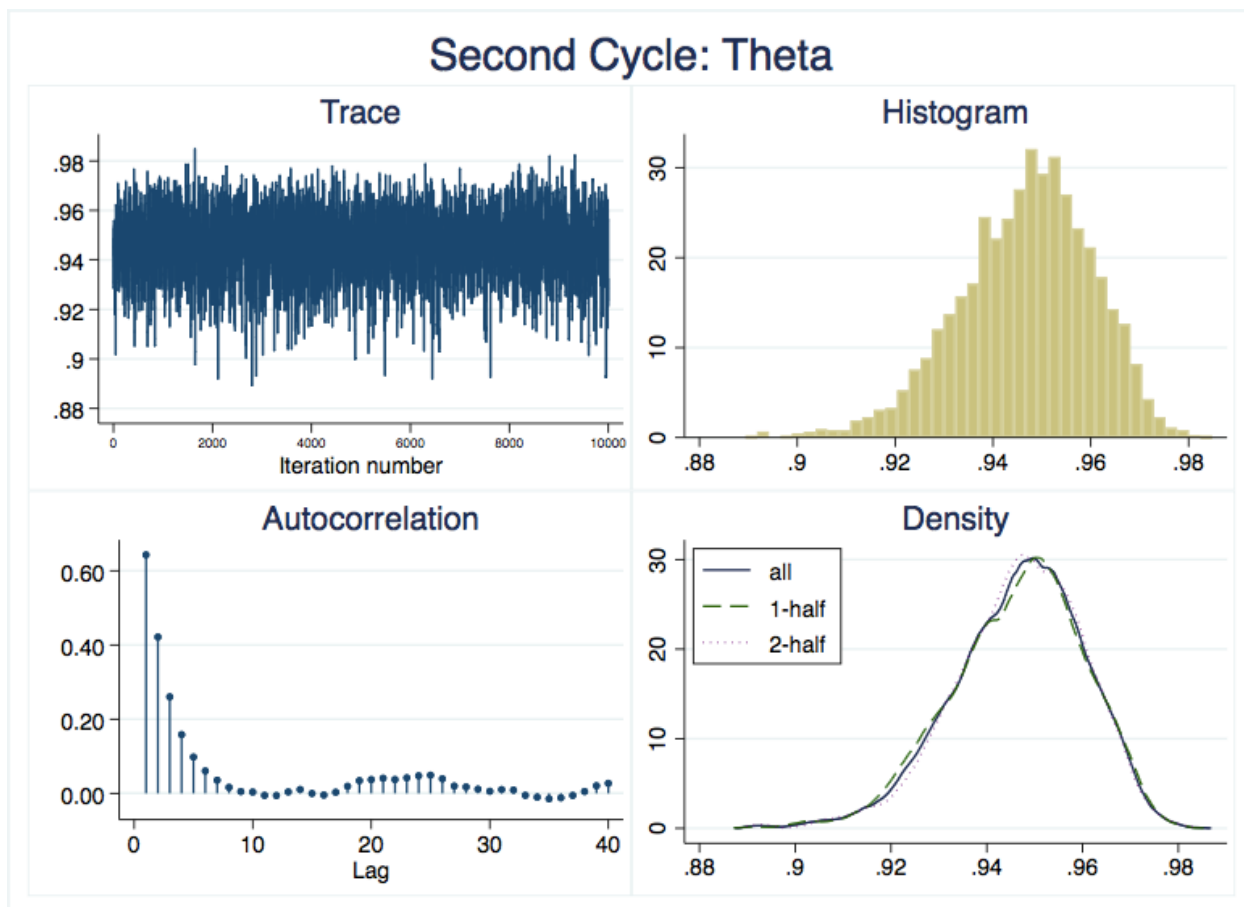

Supplement: pone.0213929.s002.pdf [file pone.0213929.s002.pdf]
