# Supplementary material for: Cost-minimization analysis of GSTP1c.313A>G genotyping for the prevention of cisplatin-induced nausea and vomiting: A Bayesian inference approach
Source: PubMed Central journal article supplement (PMC6417645; doi:10.1371/journal.pone.0213929), 2019-03-14
Supplement: pone.0213929.s003.pdf [file pone.0213929.s003.pdf]

## Supplementary file 3

### A) Overall cost of treatment with genotyping in US Dollars

| Patients | Fosaprepitant |              |              |             | 2-Sample test                   |                     | 6-Sample test                   |                     |
|----------|---------------|--------------|--------------|-------------|---------------------------------|---------------------|---------------------------------|---------------------|
|          | <i>Dose1</i>  | <i>Dose2</i> | <i>Dose3</i> | <i>Cost</i> | <i>Genotyping, amortization</i> | <i>Overall Cost</i> | <i>Genotyping, amortization</i> | <i>Overall Cost</i> |
| 0        | 0             | 0            | 0            | 0           | \$7,272.97                      | \$7,272.97          | \$7,272.97                      | \$7,272.97          |
| 25       | 15            | 15           | 12           | \$3,421.57  | \$8,271.54                      | \$11,693.11         | \$7,662.30                      | \$11,083.87         |
| 50       | 29            | 30           | 25           | \$6,843.15  | \$9,270.11                      | \$16,113.25         | \$8,051.62                      | \$14,894.76         |
| 75       | 44            | 46           | 37           | \$10,264.72 | \$10,268.67                     | \$20,533.39         | \$8,440.94                      | \$18,705.66         |
| 100      | 59            | 61           | 49           | \$13,686.29 | \$11,267.24                     | \$24,953.53         | \$8,830.26                      | \$22,516.56         |
| 125      | 73            | 76           | 61           | \$17,107.86 | \$12,265.81                     | \$29,373.67         | \$9,219.59                      | \$26,327.45         |
| 150      | 88            | 91           | 74           | \$20,529.44 | \$13,264.37                     | \$33,793.81         | \$9,608.91                      | \$30,138.35         |
| 175      | 103           | 107          | 86           | \$23,951.01 | \$14,262.94                     | \$38,213.95         | \$9,998.23                      | \$33,949.24         |
| 200      | 117           | 122          | 98           | \$27,372.58 | \$15,261.51                     | \$42,634.09         | \$10,387.56                     | \$37,760.14         |
| 225      | 132           | 137          | 110          | \$30,794.16 | \$16,260.07                     | \$47,054.23         | \$10,776.88                     | \$41,571.04         |
| 250      | 147           | 152          | 123          | \$34,215.73 | \$17,258.64                     | \$51,474.37         | \$11,166.20                     | \$45,381.93         |
| 275      | 161           | 168          | 135          | \$37,637.30 | \$18,257.21                     | \$55,894.51         | \$11,555.52                     | \$49,192.83         |
| 300      | 176           | 183          | 147          | \$41,058.88 | \$19,255.77                     | \$60,314.65         | \$11,944.85                     | \$53,003.72         |
| 325      | 191           | 198          | 160          | \$44,480.45 | \$20,254.34                     | \$64,734.79         | \$12,334.17                     | \$56,814.62         |
| 350      | 205           | 213          | 172          | \$47,902.02 | \$21,252.91                     | \$69,154.93         | \$12,723.49                     | \$60,625.51         |
| 375      | 220           | 229          | 184          | \$51,323.59 | \$22,251.47                     | \$73,575.07         | \$13,112.82                     | \$64,436.41         |
| 400      | 235           | 244          | 196          | \$54,745.17 | \$23,250.04                     | \$77,995.21         | \$13,502.14                     | \$68,247.31         |
| 425      | 249           | 259          | 209          | \$58,166.74 | \$24,248.61                     | \$82,415.35         | \$13,891.46                     | \$72,058.20         |
| 450      | 264           | 274          | 221          | \$61,588.31 | \$25,247.17                     | \$86,835.49         | \$14,280.78                     | \$75,869.10         |
| 475      | 279           | 290          | 233          | \$65,009.89 | \$26,245.74                     | \$91,255.63         | \$14,670.11                     | \$79,679.99         |
| 500      | 293           | 305          | 246          | \$68,431.46 | \$27,244.31                     | \$95,675.77         | \$15,059.43                     | \$83,490.89         |

Formulas:

Dose 1: Patients\*P1

Dose 2: Patients\*P1\*P3 + Patients\*(1-P1)\*P2\*P3

Dose 3: Patients\*P1\*P3\*P4 + Patients\*(1-P1)\*(1-P2)\*P3\*P2\*P4

Cost Fosaprepitant: (Dose1 + Dose2+ Dose3)\* \$ 81.08

Genotyping and amortization (2-Sample test): Patients\*39.94 + \$ 7,272.97

Overall Cost (2-Sample test): Fosaprepitant + Genetic test and amortization (2-Sample test)

Genotyping and amortization (6-Sample test): Patients\*15.75 + \$ 7,272.97

Overall Cost (6-Sample test): Fosaprepitant + Genetic test and amortization (6-Sample test)

## **B) Overall cost of standard fosaprepitant prescription**

| <b>Patients</b> | <b>Dose 1</b> | <b>Dose 2</b> | <b>Dose 3</b> | <b>Fosaprepitant Cost</b> |
|-----------------|---------------|---------------|---------------|---------------------------|
| 0               | 0             | 0             | 0             | 0                         |
| 25              | 25            | 24            | 18            | \$5,380.81                |
| 50              | 50            | 47            | 35            | \$10,761.62               |
| 75              | 75            | 71            | 53            | \$16,142.44               |
| 100             | 100           | 95            | 71            | \$21,523.25               |
| 125             | 125           | 118           | 88            | \$26,904.06               |
| 150             | 150           | 142           | 106           | \$32,284.87               |
| 175             | 175           | 166           | 124           | \$37,665.69               |
| 200             | 200           | 189           | 142           | \$43,046.50               |
| 225             | 225           | 213           | 159           | \$48,427.31               |
| 250             | 250           | 237           | 177           | \$53,808.12               |
| 275             | 275           | 260           | 195           | \$59,188.93               |
| 300             | 300           | 284           | 212           | \$64,569.75               |
| 325             | 325           | 308           | 230           | \$69,950.56               |
| 350             | 350           | 331           | 248           | \$75,331.37               |
| 375             | 375           | 355           | 265           | \$80,712.18               |
| 400             | 400           | 379           | 283           | \$86,093.00               |
| 425             | 425           | 402           | 301           | \$91,473.81               |
| 450             | 450           | 426           | 319           | \$96,854.62               |
| 475             | 475           | 450           | 336           | \$102,235.43              |
| 500             | 500           | 473           | 354           | \$107,616.24              |

### C) Overall cost per patient

| Patients | Fosaprepitant |                   | 2-Sample Analysis |                   | 6-Sample Analysis |                   |
|----------|---------------|-------------------|-------------------|-------------------|-------------------|-------------------|
|          | Mean          | CI                | Mean              | CI                | Mean              | CI                |
| 25       | \$156.08      | \$141.71 - 169.52 | \$486.94          | \$472.57 - 500.38 | \$462.57          | \$448.19 - 476.00 |
| 50       | \$156.08      | \$141.71 - 169.52 | \$341.48          | \$327.11 - 354.92 | \$317.11          | \$302.73 - 330.54 |
| 75       | \$156.08      | \$141.71 - 169.52 | \$293.00          | \$278.63 - 306.44 | \$268.63          | \$254.25 - 282.06 |
| 100      | \$156.08      | \$141.71 - 169.52 | \$268.75          | \$254.38 - 282.19 | \$244.38          | \$230.00 - 257.81 |
| 125      | \$156.08      | \$141.71 - 169.52 | \$254.21          | \$239.84 - 267.65 | \$229.84          | \$215.46 - 243.27 |
| 150      | \$156.08      | \$141.71 - 169.52 | \$244.51          | \$230.14 - 257.95 | \$220.14          | \$205.76 - 233.57 |
| 175      | \$156.08      | \$141.71 - 169.52 | \$237.58          | \$223.21 - 251.02 | \$213.21          | \$198.83 - 226.64 |
| 200      | \$156.08      | \$141.71 - 169.52 | \$232.39          | \$218.02 - 245.83 | \$208.02          | \$193.64 - 221.45 |
| 225      | \$156.08      | \$141.71 - 169.52 | \$228.35          | \$213.98 - 241.79 | \$203.98          | \$189.60 - 217.41 |
| 250      | \$156.08      | \$141.71 - 169.52 | \$225.12          | \$210.74 - 238.55 | \$200.75          | \$186.37 - 214.18 |
| 275      | \$156.08      | \$141.71 - 169.52 | \$222.47          | \$208.10 - 235.91 | \$198.10          | \$183.72 - 211.53 |
| 300      | \$156.08      | \$141.71 - 169.52 | \$220.27          | \$205.90 - 233.71 | \$195.90          | \$181.52 - 209.33 |
| 325      | \$156.08      | \$141.71 - 169.52 | \$218.40          | \$204.03 - 231.84 | \$194.03          | \$179.65 - 207.46 |
| 350      | \$156.08      | \$141.71 - 169.52 | \$216.80          | \$202.43 - 230.24 | \$192.43          | \$178.05 - 205.86 |
| 375      | \$156.08      | \$141.71 - 169.52 | \$215.42          | \$201.05 - 228.86 | \$191.05          | \$176.67 - 204.48 |
| 400      | \$156.08      | \$141.71 - 169.52 | \$214.21          | \$199.84 - 227.65 | \$189.84          | \$175.46 - 203.27 |
| 425      | \$156.08      | \$141.71 - 169.52 | \$213.14          | \$198.77 - 226.58 | \$188.77          | \$174.39 - 202.20 |
| 450      | \$156.08      | \$141.71 - 169.52 | \$212.19          | \$197.81 - 225.62 | \$187.82          | \$173.44 - 201.25 |
| 475      | \$156.08      | \$141.71 - 169.52 | \$211.34          | \$196.96 - 224.77 | \$186.97          | \$172.59 - 200.40 |
| 500      | \$156.08      | \$141.71 - 169.52 | \$210.57          | \$196.20 - 224.01 | \$186.20          | \$171.82 - 199.63 |

\*Considering only the patients that conclude the entire treatment (3 cycles of chemotherapy)

Overall cost per patient (2-Sample analysis), corresponding to: (1) the cost of Fosaprepitant; (2) the amortization cost per test, calculated by dividing the annual amortization cost by the initial number of patients; (3) the test costs concerning manpower and reagents (\$ 39.94 per test).

Overall cost per patient (6-Sample analysis), corresponding to: (1) the cost of Fosaprepitant; (2) the amortization cost per test, calculated by dividing the annual amortization cost by the initial number of patients; (3) the test costs concerning manpower and reagents (\$ 15.75 per test).
